# Supplementary material
Source: ML conference proceedings conference paper supplement (https://proceedings.mlr.press/v80/chen18e.html)
Supplement: Supplementary file 1 [file chen18e-supp.pdf]

## A Proof of Lemma 1

*Proof.* Let us write  $\tilde{\mu}^{t+1} = \Pi_{\mathcal{U}, KL}(\tilde{\mu}^{t+1/2})$  where  $\tilde{\mu}^{t+1/2}$  is the update vector prior to the projection step. Denote by  $(i_t, u_t, s_t, a_t, s'_t, r_t)$  the sample at iteration  $t$ . Define the vector  $\Delta^{t+1} \in \mathbb{R}^{D \times U}$  to be  $\Delta_{i_t, u_t}^{t+1} = \frac{\Phi_{s'_t} \tilde{v}^t - \Phi_{s_t} \tilde{v}^t + r_t - M}{\tilde{\mu}_{i_t, u_t}^t}$  and  $\Delta_{i, u}^{t+1} = 0$  for all  $(i, u) \neq (i_t, u_t)$ . Then the vector  $\tilde{\mu}^{t+1/2}$  can be equivalently written as

$$\tilde{\mu}_{i, u}^{t+1/2} = \frac{\tilde{\mu}_{i, u}^t \cdot \exp(\beta \Delta_{i, u}^{t+1})}{\sum_{i', u'} \tilde{\mu}_{i', u'}^t \cdot \exp(\beta \Delta_{i', u'}^{t+1})}, \quad \forall i \in 1, \dots, D, u \in 1, \dots, U.$$

Recall that  $\check{v} = \operatorname{argmin}_{\tilde{v} \in \mathcal{V}} \|\Phi \tilde{v} - v^*\|_\infty$  and  $\check{\mu} = \operatorname{argmin}_{\tilde{\mu} \in \mathcal{U}} \|\Phi \tilde{\mu} \Psi^\top - \mu^*\|_{1,1}$ . We obtain that

$$\begin{aligned} D_{KL}(\check{\mu} \|\tilde{\mu}^{t+1/2}) - D_{KL}(\check{\mu} \|\tilde{\mu}^t) &= \sum_{i=1}^D \sum_{u=1}^U \check{\mu}_{i, u} \log \frac{\tilde{\mu}_{i, u}^{t+1/2}}{\tilde{\mu}_{i, u}^t} - \sum_{i=1}^D \sum_{u=1}^U \check{\mu}_{i, u} \log \frac{\tilde{\mu}_{i, u}^t}{\tilde{\mu}_{i, u}^t} \\ &= \sum_{i=1}^D \sum_{u=1}^U \check{\mu}_{i, u} \log \frac{\tilde{\mu}_{i, u}^{t+1/2}}{\tilde{\mu}_{i, u}^t} \\ &= \sum_{i=1}^D \sum_{u=1}^U \check{\mu}_{i, u} \log \frac{Z}{\exp(\beta \Delta_{i, u}^{t+1})} \\ &= \log Z - \beta \sum_{i=1}^D \sum_{u=1}^U \check{\mu}_{i, u} \Delta_{i, u}^{t+1}, \end{aligned}$$

where we let  $Z = \sum_{i=1}^D \sum_{u=1}^U \tilde{\mu}_{i, u}^t \cdot \exp(\beta \Delta_{i, u}^{t+1})$ . According to the definition of  $\mathcal{V}$ , we have  $|\Phi_{s^*} \tilde{v}^t| \leq 2t_{mix}$  for all state  $s$ . Combining with our choice of  $M = 4t_{mix} + 1$ , we have  $\Delta_{i, u}^{t+1} \leq 0$  for all  $i = 1, \dots, D$  and  $u = 1, \dots, U$ . Consequently, applying the inequalities  $e^x \leq 1 + x + \frac{1}{2}x^2$  for all  $x \leq 0$  and  $\log(1 + x) \leq x$  for all  $x > -1$ , we have

$$\begin{aligned} \log Z &= \log \sum_{i=1}^D \sum_{u=1}^U \tilde{\mu}_{i, u}^t \cdot \exp(\beta \Delta_{i, u}^{t+1}) \leq \log \sum_{i=1}^D \sum_{u=1}^U \tilde{\mu}_{i, u}^t \left( 1 + \beta \Delta_{i, u}^{t+1} + \frac{\beta^2}{2} (\Delta_{i, u}^{t+1})^2 \right) \\ &= \log \left( 1 + \beta \sum_{i=1}^D \sum_{u=1}^U \tilde{\mu}_{i, u}^t \Delta_{i, u}^{t+1} + \frac{\beta^2}{2} \sum_{i=1}^D \sum_{u=1}^U \tilde{\mu}_{i, u}^t (\Delta_{i, u}^{t+1})^2 \right) \\ &\leq \beta \sum_{i=1}^D \sum_{u=1}^U \tilde{\mu}_{i, u}^t \Delta_{i, u}^{t+1} + \frac{\beta^2}{2} \sum_{i=1}^D \sum_{u=1}^U \tilde{\mu}_{i, u}^t (\Delta_{i, u}^{t+1})^2 \end{aligned}$$

Combining the above results, we have

$$D_{KL}(\check{\mu} \|\tilde{\mu}^{t+1/2}) - D_{KL}(\check{\mu} \|\tilde{\mu}^t) \leq \beta \sum_{i=1}^D \sum_{u=1}^U (\tilde{\mu}_{i, u}^t - \check{\mu}_{i, u}) \Delta_{i, u}^{t+1} + \frac{\beta^2}{2} \sum_{i=1}^D \sum_{u=1}^U \tilde{\mu}_{i, u}^t (\Delta_{i, u}^{t+1})^2. \quad (\text{A.1})$$

In order to prove Lemma 1, we now show that  $\mathbf{E}[\Delta_{i, u}^{t+1} | \mathcal{F}_t] = \sum_{a \in \mathcal{A}} \Psi_{a, u} \Phi_{*i}^\top ((P_a - I) \Phi \tilde{v}^t + r_a - M \cdot \mathbf{1}_S)$  and that  $\sum_{i=1}^D \sum_{u=1}^U \tilde{\mu}_{i, u}^t \mathbf{E}[(\Delta_{i, u}^{t+1})^2 | \mathcal{F}_t] \leq 100DUt_{mix}^2$ . We use  $\mathbf{1}_S$  to denote the all one column vector with dimension  $S$ . Recall that  $(i_t, u_t)$  is sampled from  $\tilde{\mu}^t$ ,  $s_t$  is sampled from  $\phi_{i_t}$ ,  $a_t$  is sampled from  $\psi_{u_t}$  and  $s'_t$

is sampled from  $P_{u_t}(s_t, \cdot)$ . Hence, for all  $(i, u)$ , we have

$$\begin{aligned} \mathbf{E}[\Delta_{i,u}^{t+1} | \mathcal{F}_t] &= \tilde{\mu}_{i,u}^t \sum_{a \in \mathcal{A}} \sum_{s \in \mathcal{S}} \sum_{s' \in \mathcal{S}} \Psi_{a,u} \cdot \Phi_{s,i} \cdot P_a(s, s') \cdot \frac{\Phi_{s'*} \tilde{v}^t + r_a(s) - \Phi_{s*} \tilde{v}^t - M}{\tilde{\mu}_{i,u}^t} \\ &= \sum_{a \in \mathcal{A}} \sum_{s \in \mathcal{S}} \Psi_{a,u} \Phi_{s,i} (P_a(s, \cdot) \Phi \tilde{v}^t + r_a(s) - \Phi_{s*} \tilde{v}^t - M) \\ &= \sum_{a \in \mathcal{A}} \Psi_{a,u} \Phi_{*i}^\top (P_a \Phi \tilde{v}^t + r_a - \Phi \tilde{v}^t - M \cdot \mathbf{1}_S). \end{aligned}$$

It remains to prove that  $\sum_{i=1}^D \sum_{u=1}^U \tilde{\mu}_{i,u}^t \mathbf{E}[(\Delta_{i,u}^{t+1})^2 | \mathcal{F}_t] \leq 100DUt_{mix}^2$ . Expanding the expectation, we have

$$\begin{aligned} &\sum_{i=1}^D \sum_{u=1}^U \tilde{\mu}_{i,u}^t \mathbf{E}[(\Delta_{i,u}^{t+1})^2 | \mathcal{F}_t] \\ &= \sum_{i=1}^D \sum_{u=1}^U \tilde{\mu}_{i,u}^t \sum_{a \in \mathcal{A}} \sum_{s \in \mathcal{S}} \sum_{s' \in \mathcal{S}} \Psi_{a,u} \cdot \tilde{\mu}_{i,u}^t \cdot \Phi_{s,i} \cdot P_a(s, s') \left( \frac{\Phi_{s'*} \tilde{v}^t + r_a(s) - \Phi_{s*} \tilde{v}^t - M}{\tilde{\mu}_{i,u}^t} \right)^2 \\ &= \sum_{i=1}^D \sum_{u=1}^U \sum_{a, s, s'} \Psi_{a,u} \cdot \Phi_{s,i} \cdot P_a(s, s') (\Phi_{s'*} \tilde{v}^t + r_a(s) - \Phi_{s*} \tilde{v}^t - M)^2 \\ &\leq \sum_{i=1}^D \sum_{u=1}^U \sum_{a, s, s'} \Psi_{a,u} \cdot \Phi_{s,i} \cdot P_a(s, s') (8t_{mix} + 2)^2 \\ &= DU(8t_{mix} + 2)^2 \leq 100DUt_{mix}^2, \end{aligned}$$

where the first inequality uses the relation that  $|\Phi_{s'*} \tilde{v}^t + r_a(s) - \Phi_{s*} \tilde{v}^t - M| \leq 8t_{mix} + 2$ , the third equality is due to that  $\sum_{a, s, s'} \Psi_{a,u} \cdot \Phi_{s,i} \cdot P_a(s, s') = 1$  and the last inequality is because  $t_{mix} \geq 1$ . Substituting the above bounds in equation (A.1), we obtain that

$$\begin{aligned} &\mathbf{E}[D_{KL}(\check{\mu} \| \tilde{\mu}^{t+1/2}) | \mathcal{F}_t] - D_{KL}(\check{\mu} \| \tilde{\mu}^t) \\ &\leq \beta \sum_{a \in \mathcal{A}} \sum_{i=1}^D \sum_{u=1}^U (\tilde{\mu}_{i,u}^t - \check{\mu}_{i,u}) \Psi_{a,u} \Phi_{*i}^\top ((P_a - I) \Phi \tilde{v}^t + r_a - M \cdot \mathbf{1}_S) + \frac{\beta^2}{2} \cdot 100DUt_{mix}^2 \\ &\leq \beta \sum_{a \in \mathcal{A}} \Psi_{a*} (\tilde{\mu}^t - \check{\mu})^\top \Phi^\top ((P_a - I) \Phi \tilde{v}^t + r_a) + 50\beta^2 DUt_{mix}^2, \end{aligned}$$

where the last inequality is due to that

$$\sum_{a \in \mathcal{A}} \Psi_{a*} (\tilde{\mu}^t)^\top \Phi^\top \mathbf{1}_S = \sum_{a \in \mathcal{A}} \Psi_{a*} (\check{\mu})^\top \Phi^\top \mathbf{1}_S = 1.$$

Recall that  $\tilde{\mu}^{t+1} = \Pi_{\mathcal{U}, KL}(\tilde{\mu}^{t+1/2}) = \operatorname{argmin}_{\mu' \in \mathcal{U}} D_{KL}(\mu' \| \tilde{\mu}^{t+1/2})$  and  $\mathcal{U}$  is a convex set. By the property of information projection with regard to KL divergence (see [1] Theorem 11.6.1 on page 367), we have

$$\mathbf{E}[D_{KL}(\check{\mu} \| \tilde{\mu}^{t+1}) | \mathcal{F}_t] \leq \mathbf{E}[D_{KL}(\check{\mu} \| \tilde{\mu}^{t+1/2}) | \mathcal{F}_t].$$

Combining the above inequalities, we conclude that

$$\begin{aligned} &\mathbf{E}[D_{KL}(\check{\mu} \| \tilde{\mu}^{t+1}) | \mathcal{F}_t] - D_{KL}(\check{\mu} \| \tilde{\mu}^t) \leq \mathbf{E}[D_{KL}(\check{\mu} \| \tilde{\mu}^{t+1/2}) | \mathcal{F}_t] - D_{KL}(\check{\mu} \| \tilde{\mu}^t) \\ &\leq \beta \sum_{a \in \mathcal{A}} \Psi_{a*} (\tilde{\mu}^t - \check{\mu})^\top \Phi^\top ((P_a - I) \Phi \tilde{v}^t + r_a) + 50\beta^2 DUt_{mix}^2, \end{aligned}$$

Finally, observe that

$$D_{KL}(\check{\mu} \|\check{\mu}^1) = \sum_{i=1}^D \sum_{u=1}^U \check{\mu}_{i,u} \log \frac{\check{\mu}_{i,u}}{1/(DU)} = \sum_{i=1}^D \sum_{u=1}^U \check{\mu}_{i,u} \log(DU) + \sum_{i=1}^D \sum_{u=1}^U \check{\mu}_{i,u} \log(\check{\mu}_{i,u}) \leq \log(DU),$$

where the last inequality is due to that  $\check{\mu}_{i,u} \leq 1$  and thus  $\log(\check{\mu}_{i,u}) \leq 0$  for all  $i, u$ . To this point, we complete the proof of Lemma 1.  $\square$

## B Proof of Lemma 2

*Proof.* Let  $(i_t, u_t, s_t, a_t, s'_t, r_t)$  be the sample at iteration  $t$ . Throughout the proof, we use the shorthand  $\Delta^{t+1} \triangleq \Phi_{s'_t}^\top - \Phi_{s_t}^\top$ . According to the update of Algorithm 1, we have  $\check{v}^{t+1} = \Pi_{\mathcal{V}}(\check{v}^t - \alpha \Delta^{t+1})$ . By using the nonexpansive property of  $\Pi_{\mathcal{V}}$ , we obtain that

$$\begin{aligned} \mathbf{E} [\|\check{v}^{t+1} - \check{v}\|_2^2 \mid \mathcal{F}_t] &= \mathbf{E} [\|\Pi_{\mathcal{V}}(\check{v}^t - \alpha \Delta^{t+1}) - \check{v}\|_2^2 \mid \mathcal{F}_t] \leq \mathbf{E} [\|\check{v}^t - \alpha \Delta^{t+1} - \check{v}\|_2^2 \mid \mathcal{F}_t] \\ &= \|\check{v}^t - \check{v}\|_2^2 - 2\alpha \mathbf{E}[(\Delta^{t+1})^\top \mid \mathcal{F}_t](\check{v}^t - \check{v}) + \alpha^2 \mathbf{E}[\|\Delta^{t+1}\|_2^2 \mid \mathcal{F}_t]. \end{aligned} \quad (\text{B.1})$$

Recall that  $(i_t, u_t)$  is sampled from  $\tilde{\mu}^t$ ,  $a_t$  is sampled from  $\psi_{u_t}$ ,  $s_t$  is sampled from  $\phi_{i_t}$  and  $s'_t$  is sampled from  $P_{a_t}(s_t, \cdot)$ . We can expand the expectation of  $\mathbf{E}[(\Delta^{t+1})^\top \mid \mathcal{F}_t]$  to obtain that

$$\begin{aligned} \mathbf{E}[(\Delta^{t+1})^\top \mid \mathcal{F}_t] &= \sum_{a \in \mathcal{A}} \sum_{i=1}^D \sum_{u=1}^U \sum_{s \in \mathcal{S}} \sum_{s' \in \mathcal{S}} \Psi_{a,u} \tilde{\mu}_{i,u}^t \Phi_{s,i} P_a(s, s') (\Phi_{s'} - \Phi_{s'}) \\ &= \sum_{a \in \mathcal{A}} \sum_{i=1}^D \sum_{u=1}^U \sum_{s \in \mathcal{S}} \Psi_{a,u} \tilde{\mu}_{i,u}^t \Phi_{s,i} (P_a(s, \cdot) \Phi - \Phi_{s'}) = \sum_{a \in \mathcal{A}} \sum_{i=1}^D \sum_{u=1}^U \Psi_{a,u} \tilde{\mu}_{i,u}^t \Phi_{*i}^\top (P_a \Phi - \Phi) \\ &= \sum_{a \in \mathcal{A}} \sum_{u=1}^U \Psi_{a,u} (\tilde{\mu}_{*u}^t)^\top \Phi^\top (P_a \Phi - \Phi) = \sum_{a \in \mathcal{A}} \Psi_{a*} (\tilde{\mu}^t)^\top \Phi^\top (P_a \Phi - \Phi). \end{aligned}$$

Next we prove that  $\mathbf{E}[\|\Delta^{t+1}\|_2^2 \mid \mathcal{F}_t] \leq \|\Phi\|_{2,\infty}^2$ . A straightforward calculation yields that

$$\begin{aligned} \mathbf{E}[\|\Delta^{t+1}\|_2^2 \mid \mathcal{F}_t] &= \sum_{a \in \mathcal{A}} \sum_{i=1}^D \sum_{u=1}^U \sum_{s \in \mathcal{S}} \sum_{s' \in \mathcal{S}} \Psi_{a,u} \tilde{\mu}_{i,u}^t \Phi_{s,i} P_a(s, s') \|\Phi_{s'} - \Phi_{s'}\|_2^2 \\ &\leq \sum_{a \in \mathcal{A}} \sum_{i=1}^D \sum_{u=1}^U \sum_{s \in \mathcal{S}} \sum_{s' \in \mathcal{S}} \Psi_{a,u} \tilde{\mu}_{i,u}^t \Phi_{s,i} P_a(s, s') (2\|\Phi_{s'}\|_2^2 + 2\|\Phi_{s'}\|_2^2) \\ &\leq \sum_{a \in \mathcal{A}} \sum_{i=1}^D \sum_{u=1}^U \sum_{s \in \mathcal{S}} \sum_{s' \in \mathcal{S}} \Psi_{a,u} \tilde{\mu}_{i,u}^t \Phi_{s,i} P_a(s, s') (4\|\Phi\|_{2,\infty}^2) = 4\|\Phi\|_{2,\infty}^2, \end{aligned}$$

where the last equality is due to that  $\tilde{\mu}$ ,  $\psi_u$  and  $\phi_i$  are distributions and  $\sum_{i,u,a,s,s'} \Psi_{a,u} \tilde{\mu}_{i,u}^t \Phi_{s,i} P_a(s, s') = 1$ . Substituting the above bounds into equation (B.1), we get the first part of Lemma 2.

It remains to show that  $\|\check{v}^1 - \check{v}\|_2^2 = \|\check{v}\|_2^2 \leq \frac{4Dt_{mix}^2 \|\Phi\|_1^2}{\lambda_{\min}^2(\Phi^\top \Phi)}$ . Let  $v' \triangleq \Phi \check{v}$ . Multiply  $v'$  by  $\Phi^\top$  and we get  $\Phi^\top v' = \Phi^\top \Phi \check{v}$ . Hence, by Assumption 1 that  $\Phi^\top \Phi$  is invertible, we have

$$\check{v} = (\Phi^\top \Phi)^{-1} \Phi^\top v'$$

By our definition of  $\check{v}$  and  $\mathcal{V}$ , we have  $\|v'\|_\infty \leq 2t_{mix}$ . Using the relation that  $\lambda_{\max}((\Phi^\top \Phi)^{-1}) = \frac{1}{\lambda_{\min}(\Phi^\top \Phi)}$  where  $\lambda_{\max}$  and  $\lambda_{\min}$  denotes the largest and the smallest eigenvalue, we obtain

$$\begin{aligned} \|\check{v}\|_2^2 &\leq \|(\Phi^\top \Phi)^{-1}\|_2^2 \|\Phi^\top v'\|_2^2 \leq \frac{1}{\lambda_{\min}^2(\Phi^\top \Phi)} \cdot 4t_{mix}^2 \cdot \|\Phi^\top\|_{1,2}^2 \\ &\leq \frac{4t_{mix}^2}{\lambda_{\min}^2(\Phi^\top \Phi)} \cdot D \cdot \|\Phi^\top\|_{1,\infty}^2 = \frac{4t_{mix}^2 D \|\Phi\|_1^2}{\lambda_{\min}^2(\Phi^\top \Phi)}. \end{aligned}$$

As a result, we have  $\|\tilde{v}\|_2^2 \leq \frac{4t_{mix}^2 D \|\Phi\|_1^2}{\lambda_{\min}^2(\Phi^\top \Phi)}$ . Recall that every column of  $\Phi$  is a distribution and thus  $\|\Phi\|_1 = 1$ . Using this relationship, we obtain that  $\|\tilde{v}\|_2^2 \leq \frac{4t_{mix}^2 D}{\lambda_{\min}^2(\Phi^\top \Phi)}$ .  $\square$

## C Proof of Theorem 4

*Proof.* All the norms used in the proof of Theorem 4 are matrix norms. For a matrix  $\Phi$  of size  $m \times n$ , the matrix  $p$ -norm for  $1 \leq p \leq \infty$  is defined as  $\|\Phi\|_p = \max\{\|\Phi v\|_p : v \in \mathbb{R}^n \text{ with } \|v\|_p = 1\}$ . Especially,  $\|\Phi\|_1$  is the maximum absolute column sum and  $\|\Phi\|_\infty$  is the maximum absolute row sum.

We begin by analyzing the behavior of the duality gap in Theorem 2. By some algebra, we can rewrite the LFS of equation (9) as

$$\begin{aligned} & \sum_{a \in \mathcal{A}} r_a^\top \mu_{*a}^* + \frac{1}{T} \sum_{t=1}^T \mathbf{E} \left[ \sum_{a \in \mathcal{A}} ((I - P_a)v^* - r_a)^\top \Phi \tilde{\mu}^t \Psi_{a*}^\top \right] \\ & - \underbrace{\frac{1}{T} \sum_{t=1}^T \mathbf{E} \left[ \sum_{a \in \mathcal{A}} (\Phi \tilde{\mu} \Psi_{a*}^\top)^\top (I - P_a) \Phi \tilde{v}^t \right]}_{(i)} + \underbrace{\sum_{a \in \mathcal{A}} (\Phi \tilde{\mu} \Psi_{a*}^\top - \mu_{*a}^*)^\top r_a}_{(ii)} \\ & + \underbrace{\frac{1}{T} \sum_{t=1}^T \mathbf{E} \left[ \sum_{a \in \mathcal{A}} (\Phi \tilde{\mu}^t \Psi_{a*}^\top)^\top (I - P_a) (\Phi \tilde{v} - v^*) \right]}_{(iii)}, \end{aligned} \tag{C.1}$$

where  $\mu_{*a}^*$  is the  $a$ -th column of  $\mu^*$ . Next, we bound (i), (ii), (iii) respectively.

Analysis of (i): Recall that the stationary distribution  $\mu^*$  satisfies the condition  $\sum_{a \in \mathcal{A}} (\mu_{*a}^*)^\top (I - P_a) = \mathbf{0}_S$ . So we can bound (i) by

$$\begin{aligned} |(i)| & \leq \left\| \sum_{a \in \mathcal{A}} (\Phi \tilde{\mu} \Psi_{a*}^\top - \mu_{*a}^*)^\top (I - P_a) \right\|_\infty \left\| \frac{1}{T} \sum_{t=1}^T \mathbf{E}[\Phi \tilde{v}^t] \right\|_\infty \\ & \leq \sum_{a \in \mathcal{A}} \|(\Phi \tilde{\mu} \Psi_{a*}^\top - \mu_{*a}^*)^\top\|_\infty (\|I\|_\infty + \|P_a\|_\infty) \cdot 2t_{mix} \\ & \leq 4t_{mix} \|\Phi \tilde{\mu} \Psi^\top - \mu^*\|_{1,1}, \end{aligned}$$

where the first inequality is due to that  $\|\Phi_1 \Phi_2\|_\infty \leq \|\Phi_1\|_\infty \|\Phi_2\|_\infty$  for two matrices  $\Phi_1$  and  $\Phi_2$ , the second inequality is due to that  $\|\Phi \tilde{v}^t\|_\infty \leq 2t_{mix}$  for all  $t$  (see Lemma 1 in [2]). In the third inequality, we use the fact that the matrix  $\infty$ -norm of a row vector is the sum of its components. And thus we have  $\sum_{a \in \mathcal{A}} \|(\Phi \tilde{\mu} \Psi_{a*}^\top - \mu_{*a}^*)^\top\|_\infty = \|\Phi \tilde{\mu} \Psi^\top - \mu^*\|_{1,1}$ .

Analysis of (ii): Using the inequality that  $\|\Phi_1 \Phi_2\|_\infty \leq \|\Phi_1\|_\infty \|\Phi_2\|_\infty$  for two matrices  $\Phi_1, \Phi_2$ , we have

$$|(ii)| \leq \sum_{a \in \mathcal{A}} \|(\Phi \tilde{\mu} \Psi_{a*}^\top - \mu_{*a}^*)^\top\|_\infty \|r_a\|_\infty \leq \|\Phi \tilde{\mu} \Psi^\top - \mu^*\|_{1,1},$$

where the last inequality is due to that all the rewards are bounded between 0 and 1.

Analysis of (iii): We note that for any iteration  $t$ ,  $\sum_{a \in \mathcal{A}} (\Phi \tilde{\mu}^t \Psi_{a*}^\top)^\top I$  and  $\sum_{a \in \mathcal{A}} (\Phi \tilde{\mu}^t \Psi_{a*}^\top)^\top P_a$  are two row vectors that both sum to 1. Recall that the matrix  $\infty$ -norm of a row vector is the sum of its components. Thus, we have  $\|\sum_{a \in \mathcal{A}} (\Phi \tilde{\mu}^t \Psi_{a*}^\top)^\top I - \sum_{a \in \mathcal{A}} (\Phi \tilde{\mu}^t \Psi_{a*}^\top)^\top P_a\|_\infty \leq 2$ . As a result, we have

$$\begin{aligned} |(iii)| & \leq \left\| \frac{1}{T} \sum_{t=1}^T \mathbf{E} \left[ \sum_{a \in \mathcal{A}} (\Phi \tilde{\mu}^t \Psi_{a*}^\top)^\top (I - P_a) \right] \right\|_\infty \|\Phi \tilde{v} - v^*\|_\infty \\ & \leq 2 \|\Phi \tilde{v} - v^*\|_\infty, \end{aligned}$$

By Theorem 2, we have the relation that (C.1) =  $\mathcal{O}\left(t_{mix}\left(c_{\Phi} + \sqrt{U \log(DU)}\right) \sqrt{\frac{D}{T}}\right)$ . By equation (13), the first two terms of (C.1) is larger than  $\frac{1}{\tau}(\bar{v}^* - \mathbf{E}[\bar{v}^{\hat{\pi}}])$ . Combining the above results and the bounds on (i), (ii) and (iii), we draw the conclusion of Theorem 4.  $\square$

## References

- [1] Thomas M. Cover and Joy A. Thomas. *Elements of information theory*. John Wiley & Sons, 2012.
- [2] Mengdi Wang. Primal-dual  $\pi$  learning: Sample complexity and sublinear run time for ergodic markov decision problems. *CoRR*, abs/1710.06100, 2017.
